# Supplementary material
Source: publisher figshare collection journal article supplement (https://geolsoc.figshare.com/ndownloader/files/13303382)
Supplement: Supplementary file 1 [file 13303382]

## Sheet: Sheet1
Palynofacies Analysis & Optical Kerogen Analysis
Well	Depth below top Cenozoic (m TVD)	Formation	# particles	Phyclasts %	Inertinit %	Vitrinite %	Cutinite %	Sporomo %	Spores %	Pollen %	terrestrial AOM %	marine AOM %	AOM %	Phyto-plankton %	Prasino-phytes %	Acritarcs %	Dinocysts %	Leiospheres %	Freshwater algae %	Foramini-feres %	Fungi %		Kerogen Types Type I Type II Type III Type IV
A	45	UHy	250	15.6	4.8	10	0.8	12.8	9.6	3.2	0	64.8	64.8	6.4	0.4	0	2.8	3.2	0.4	0	0		68.8	15.6	10.8	4.8
A	104	UHy	222	14.8649	4.95495	9.90991	0	7.65766	4.5045	3.15315	0	74.3243	74.3243	3.15315	0.900901	0	0.45045	1.8018	0	0	0		77.027	8.10811	9.90991	4.95495
A	180	UHy	280	27.1429	7.5	19.6429	0	22.8571	15.3571	7.5	0	41.0714	41.0714	8.92857	0.357143	0	5	3.57143	0	0	0		45	27.8571	19.6429	7.5
A	269	UHy	337	31.1573	8.30861	20.7715	2.07715	14.8368	4.74777	10.089	0	43.0267	43.0267	10.9792	0.890208	0	7.71513	2.37389	0	0	0		46.2908	22.5519	22.8487	8.30861
A	342	UHy	392	34.4388	7.90816	23.7245	2.80612	10.2041	4.33673	5.86735	0	45.1531	45.1531	10.2041	0.765306	0	8.67347	0.765306	0	0	0		46.6837	18.8776	26.5306	7.90816
A	365	UHy	319	24.1379	5.95611	18.1818	0	15.047	4.07524	10.9718	0	43.8871	43.8871	16.9279	1.25392	0	15.674	0	0	0	0		45.1411	30.721	18.1818	5.95611
A	372	UHy	354	19.4915	3.38983	16.1017	0	18.6441	8.47458	10.1695	0	40.3955	40.3955	20.6215	0	0	19.4915	1.12994	0.847458	0	0		42.3729	38.1356	16.1017	3.38983
A	419	UHy	319	24.1379	5.95611	18.1818	0	15.047	4.07524	10.9718	0	43.8871	43.8871	16.9279	1.25392	0	15.674	0	0	0	0		45.1411	30.721	18.1818	5.95611
A	440	UHy	274	20.073	5.83942	14.2336	0	22.6277	6.56934	16.0584	0	45.9854	45.9854	7.29927	0	0	6.20438	1.09489	4.0146	0	0		51.0949	28.8321	14.2336	5.83942
A	455	UHy	281	20.6406	5.69395	14.9466	0	19.9288	10.6762	9.25267	0	40.5694	40.5694	18.8612	5.33808	0	11.032	2.4911	0	0	0		48.3986	30.9609	14.9466	5.69395
A	476	UHy	290	22.4138	6.89655	12.4138	3.10345	28.2759	6.89655	21.3793	0	41.3793	41.3793	7.93103	1.37931	0	4.13793	2.41379	0	0	0		45.1724	32.4138	15.5172	6.89655
A	485	UHy	330	11.5152	2.42424	8.18182	0.909091	19.0909	7.57576	11.5152	0	24.8485	24.8485	44.5455	0	0	42.4242	2.12121	0	0	0		26.9697	61.5152	9.09091	2.42424
A	509	LHy	277	24.1877	5.41516	14.8014	3.97112	19.4946	5.41516	14.0794	0	38.2671	38.2671	18.0505	0.722022	0	13.3574	3.97112	0	0	0		42.9603	32.852	18.7726	5.41516
A	516	LHy	277	30.6859	2.52708	27.4368	0.722022	23.8267	5.05415	18.7726	3.61011	32.852	36.4621	9.02527	1.80505	0	7.22022	0	0	0	0		34.657	31.0469	31.769	2.52708
A	527	LHy	303	20.462	6.60066	12.5413	1.32013	16.8317	5.94059	10.8911	0	47.8548	47.8548	14.5215	2.31023	0	9.24092	2.9703	0.330033	0	0		53.4653	26.0726	13.8614	6.60066
A	535	LHy	331	22.6586	6.34441	13.5952	2.71903	24.4713	3.62538	20.8459	0	36.858	36.858	16.0121	1.20846	0	12.0846	2.71903	0	0	0		40.7855	36.5559	16.3142	6.34441
A	554	LHy	361	30.7479	6.37119	24.3767	0	19.9446	3.60111	16.3435	0	35.1801	35.1801	13.5734	2.49307	0	11.0803	0	0.554017	0	0		38.2271	31.0249	24.3767	6.37119
A	561	LHy	341	22.8739	5.8651	14.6628	2.34604	18.4751	7.03812	11.437	0	34.8974	34.8974	23.7537	0	0	23.1672	0.58651	0	0	0		35.4839	41.6422	17.0088	5.8651
A	568	LHy	261	19.9234	13.41	4.98084	1.53257	12.6437	4.98084	7.66284	0	27.2031	27.2031	40.2299	0	0	38.6973	1.53257	0	0	0		28.7356	51.341	6.51341	13.41
A	575	LHy	313	11.1821	6.38978	4.79233	0	27.1565	16.9329	10.2236	1.59744	37.0607	38.6581	20.1278	0.638978	0	18.5304	0.958466	2.8754	0	0		41.5335	45.6869	6.38978	6.38978
A	636	Cer	329	24.3161	10.3343	13.9818	0	21.8845	2.73556	19.1489	8.20669	36.1702	44.3769	9.11854	0.911854	0	8.20669	0	0.303951	0	0		37.386	30.0912	22.1884	10.3343
A	769	CyM& ME	540	90.5556	14.4444	40.3704	35.7407	3.14815	1.48148	1.66667	4.62963	0	4.62963	1.66667	0	0	1.66667	0	0	0	0		0	4.81481	80.7407	14.4444
A	803	CyM& ME	333	29.1291	12.6126	15.3153	1.2012	20.1201	8.70871	11.4114	0	46.5465	46.5465	3.9039	0	0	3.9039	0	0.3003	0	0		46.8468	24.024	16.5165	12.6126
A	885	CyM& ME	284	84.507	19.0141	63.3803	2.11268	3.52113	3.52113	0	4.22535	0	4.22535	7.74648	0.352113	0	7.39437	0	0	0	0		0.352113	10.9155	69.7183	19.0141
A	925	RpC	348	79.3103	15.5172	59.7701	4.02299	8.62069	4.02299	4.5977	4.31034	0	4.31034	7.75862	0.862069	0	6.89655	0	0	0	0		0.862069	15.5172	68.1034	15.5172
A	935	RpC	386	80.5699	6.99482	68.9119	4.66321	7.25389	0.777202	6.47668	7.77202	0	7.77202	4.40415	0	0	2.33161	2.07254	0	0	0		2.07254	9.58549	81.3472	6.99482
A	945	RpC	356	72.191	3.93258	64.8876	3.37079	5.33708	3.37079	1.96629	12.6404	0	12.6404	9.83146	0.842697	0	8.98876	0	0	0	0		0.842697	14.3258	80.8989	3.93258
A	952	RpC	288	81.9444	9.02778	70.8333	2.08333	2.08333	2.08333	0	15.2778	0	15.2778	0.694444	0	0	0.694444	0	0	0	0		0	2.77778	88.1944	9.02778
A	964	RpC	357	72.8291	8.12325	61.3445	3.36134	5.32213	3.92157	1.40056	14.2857	0	14.2857	7.56303	0	0	7.56303	0	0	0	0		0	12.8852	78.9916	8.12325
A	970	RpC	266	70.6767	3.00752	66.1654	1.50376	3.7594	2.25564	1.50376	22.5564	0	22.5564	2.25564	0.75188	0	1.50376	0	0.75188	0	0		1.50376	5.26316	90.2256	3.00752
A	983	PE	274	79.1971	9.12409	70.073	0	7.29927	6.20438	1.09489	7.29927	1.09489	8.39416	2.91971	0	0	2.18978	0.729927	2.18978	0	0		4.0146	9.48905	77.3723	9.12409
A	990	PE	224	75	4.46429	67.4107	3.125	1.78571	1.78571	0	12.5	2.23214	14.7321	8.48214	0	0	8.48214	0	0	0	0		2.23214	10.2679	83.0357	4.46429
A	1001	PE	259	81.4672	14.6718	66.7954	0	6.17761	2.3166	3.861	3.0888	6.17761	9.26641	3.0888	0.772201	0	2.3166	0	0	0	0		6.94981	8.49421	69.8842	14.6718
A	1006	PE	264	80.303	10.6061	69.697	0	1.51515	0	1.51515	4.92424	4.92424	9.84848	8.33333	1.89394	0	4.92424	1.51515	0	0	0		8.33333	6.43939	74.6212	10.6061
A	1008	PE	235	90.2128	16.5957	73.617	0	4.25532	3.40426	0.851064	2.12766	2.97872	5.10638	0.425532	0	0	0.425532	0	0	0	0		2.97872	4.68085	75.7447	16.5957
A	1011	PE	331	66.1631	12.3867	50.7553	3.02115	7.55287	5.74018	1.81269	1.51057	13.5952	15.1057	11.1782	0	0	11.1782	0	0	0	0		13.5952	18.7311	55.287	12.3867
A	1013	PE	281	79.7153	16.3701	63.3452	0	8.54093	4.62633	3.91459	5.33808	2.84698	8.18505	3.55872	0	0	3.55872	0	0	0	0		2.84698	12.0996	68.6833	16.3701
A	1015	PE	238	61.7647	16.8067	43.6975	1.2605	11.3445	6.30252	5.04202	3.36134	18.9076	22.2689	4.62185	0.840336	0	3.78151	0	0	0	0		19.7479	15.1261	48.3193	16.8067
A	1020	PE	310	69.0323	19.0323	47.4194	2.58065	9.67742	4.83871	4.83871	12.9032	5.80645	18.7097	2.58065	0.645161	0	1.6129	0.322581	0	0	0		6.77419	11.2903	62.9032	19.0323
Well	Depth below top Cenozoic (m TVD)	Formation	# particles	Phyclasts %	Inertinit %	Vitrinite %	Cutinite %	Sporomo %	Spores %	Pollen %	terrestrial AOM %	marine AOM %	AOM %	Phyto-plankton %	Prasino-phytes %	Acritarcs %	Dinocysts %	Leiospheres %	Freshwater algae %	Foramini-feres %	Fungi %		Kerogen Types Type I Type II Type III Type IV
B	10	UHy	319	40.7524	5.64263	33.5423	1.5674	11.2853	5.01567	6.26959	1.5674	45.4545	47.0219	0.940439	0.626959	0	0.31348	0	0	0	0		46.0815	11.5987	36.6771	5.64263
B	105	UHy	303	31.3531	6.60066	24.7525	0	14.8515	7.59076	7.26073	3.30033	47.8548	51.1551	2.64026	0.990099	0	0	1.65017	0	0	0		50.495	14.8515	28.0528	6.60066
B	200	UHy	318	16.9811	2.83019	11.3208	2.83019	11.6352	8.80503	2.83019	0	59.7484	59.7484	11.6352	3.45912	0	5.34591	2.83019	0	0	0		66.0377	16.9811	14.1509	2.83019
B	305	UHy	316	1.89873	0	1.89873	0	29.4304	11.3924	18.038	0	61.7089	61.7089	6.96203	3.48101	0	1.26582	2.21519	0	0	0		67.4051	30.6962	1.89873	0
B	400	UHy	288	4.51389	1.38889	2.77778	0.347222	15.9722	6.25	9.72222	0	46.875	46.875	32.6389	5.20833	0	27.4306	0	0	0	0		52.0833	43.4028	3.125	1.38889
B	450	UHy	372	22.5806	3.76344	15.8602	2.95699	25	12.6344	12.3656	0	48.3871	48.3871	3.49462	0.806452	0	2.15054	0.537634	0.537634	0	0		50.2688	27.1505	18.8172	3.76344
B	475	UHy	383	32.6371	5.48303	26.1097	1.04439	17.4935	8.61619	8.87728	0	43.6031	43.6031	6.26632	0	0	6.26632	0	0	0	0		43.6031	23.7598	27.154	5.48303
B	495	UHy	276	15.942	3.98551	8.69565	3.26087	16.3043	9.05797	7.24638	0	54.7101	54.7101	13.0435	0	0	13.0435	0	0	0	0		54.7101	29.3478	11.9565	3.98551
B	510	UHy	269	14.4981	3.71747	10.7807	0	24.9071	14.8699	10.0372	0	56.1338	56.1338	4.46097	0	0	4.46097	0	0	0	0		56.1338	29.368	10.7807	3.71747
B	525	LHy	269	7.80669	1.11524	6.69145	0	21.9331	9.66543	12.2677	0	59.1078	59.1078	11.1524	1.11524	0	9.29368	0.743494	0	0	0		60.9665	31.2268	6.69145	1.11524
B	545	LHy	250	8	0	8	0	14.8	7.6	7.2	0	61.2	61.2	15.6	3.6	0	10.8	1.2	0.4	0	0		66.4	25.6	8	0
B	565	LHy	287	15.6794	2.09059	13.5889	0	27.1777	6.62021	20.5575	0	40.4181	40.4181	14.2857	3.13589	0	9.7561	1.39373	2.43902	0	0		47.3868	36.9338	13.5889	2.09059
B	575	LHy	307	23.4528	7.81759	14.3322	1.30293	18.5668	5.21173	13.355	0	43.3225	43.3225	13.355	0.325733	0	10.7492	2.28013	1.30293	0	0		47.2313	29.316	15.6352	7.81759
B	605	LHy	300	13	4.66667	7	1.33333	23	5.66667	17.3333	0	41.3333	41.3333	21.3333	2.66667	0	17	1.66667	1.33333	0	2.33333		47	40	8.33333	4.66667
B	635	LHy	325	22.1538	2.46154	18.7692	0.923077	18.7692	8.92308	9.84615	0	41.8462	41.8462	14.1538	1.23077	0	11.6923	1.23077	3.07692	0	0		47.3846	30.4615	19.6923	2.46154
B	665	LHy	332	37.0482	10.5422	25.3012	1.20482	26.8072	5.72289	21.0843	0.903614	21.988	22.8916	13.253	0.60241	0	12.6506	0	0	0	0		22.5904	39.4578	27.4096	10.5422
B	705	LHy	291	35.0515	8.24742	25.4296	1.37457	23.7113	4.811	18.9003	0	35.0515	35.0515	3.78007	0	0	3.78007	0	2.4055	0	0		37.457	27.4914	26.8041	8.24742
B	725	LHy	255	21.1765	5.88235	13.3333	1.96078	9.80392	2.35294	7.45098	0	47.451	47.451	21.5686	3.92157	0	17.6471	0	0	0	1.96078		51.3725	27.451	15.2941	5.88235
B	760	LHy	284	35.2113	5.98592	29.2254	0	18.662	4.22535	14.4366	0	35.5634	35.5634	10.5634	1.76056	0	8.80282	0	0	0	0		37.3239	27.4648	29.2254	5.98592
B	780	LHy	297	42.7609	10.101	29.9663	2.6936	20.202	3.0303	17.1717	0	31.3131	31.3131	5.72391	1.3468	0	4.3771	0	0	0	0		32.6599	24.5791	32.6599	10.101
B	795	LHy	334	41.018	8.98204	32.0359	0	24.2515	5.08982	19.1617	0	26.9461	26.9461	7.78443	0.898204	0	4.79042	2.09581	0	0	0		29.9401	29.0419	32.0359	8.98204
B	820	CyM	374	48.3957	12.2995	34.492	1.60428	16.8449	5.61497	11.2299	0	32.0856	32.0856	2.6738	0.534759	0	0.534759	1.60428	0	0	0		34.2246	17.3797	36.0963	12.2995
B	865	CyM & ME	350	32	6	26	0	20.2857	7.42857	12.8571	0	43.4286	43.4286	4.28571	0.571429	0	3.71429	0	0	0	0.571429		44	24	26	6
B	975	RpC	343	55.102	8.74636	40.5248	5.8309	14.2857	2.91545	11.3703	0	20.6997	20.6997	8.16327	0	0	6.99708	1.16618	1.74927	0	0		23.6152	21.2828	46.3557	8.74636
B	985	RpC	291	83.1615	12.3711	67.6976	3.09278	4.811	1.71821	3.09278	0	9.62199	9.62199	2.4055	0	0	2.4055	0	0	0	0		9.62199	7.21649	70.7904	12.3711
B	995	RpC	304	67.4342	4.93421	62.5	0	11.5132	2.30263	9.21053	1.64474	14.1447	15.7895	5.26316	0.328947	0	4.60526	0.328947	0	0	0		14.8026	16.1184	64.1447	4.93421
B	1005	RpC	337	69.4362	8.60534	56.3798	4.45104	6.23145	0.890208	5.34125	11.5727	7.12166	18.6944	3.26409	0	0	3.26409	0	2.37389	0	0		9.49555	9.49555	72.4036	8.60534
B	1040	RpC	285	50.5263	4.21053	45.2632	1.05263	7.36842	4.5614	2.80702	0	37.193	37.193	4.91228	0	0	4.91228	0	0	0	0		37.193	12.2807	46.3158	4.21053
B	1042	RpC	292	53.0822	3.08219	50	0	14.0411	3.76712	10.274	0	32.8767	32.8767	0	0	0	0	0	0	0	1.0274		32.8767	14.0411	50	3.08219
B	1052	UPE	276	62.6812	1.44928	59.058	2.17391	5.7971	2.17391	3.62319	15.942	13.0435	28.9855	2.53623	0	0	2.53623	0	0	0	0		13.0435	8.33333	77.1739	1.44928
B	1072	MPE	306	70.2614	6.53595	63.7255	0	11.4379	5.55556	5.88235	3.26797	12.4183	15.6863	2.61438	0	0	2.61438	0	0	0	1.30719		12.4183	14.0523	66.9935	6.53595
B	1088	MPE	338	56.213	5.32544	47.6331	3.25444	10.0592	7.10059	2.95858	17.4556	13.6095	31.0651	2.66272	0.887574	0	1.77515	0	0	0	0.591716		14.497	11.8343	68.3432	5.32544
B	1104	LPE	223	79.8206	8.96861	69.5067	1.34529	3.58744	2.69058	0.896861	16.5919	0	16.5919	0	0	0	0	0	0	0	0		0	3.58744	87.4439	8.96861
B	1116	LPE	287	85.7143	19.5122	66.2021	0	2.78746	2.78746	0	9.7561	1.74216	11.4983	0	0	0	0	0	0	0	0		1.74216	2.78746	75.9582	19.5122
